# Supplementary material for: A simple and efficient approach toward deep-red to near-infrared-emitting iridium(iii) complexes for organic light-emitting diodes with external quantum efficiencies of over 10%
Source: PubMed Central journal article supplement — Chem Sci. 2020 Feb 3;11(9):2342–9. doi: 10.1039/c9sc05492h (PMC8157343; doi:10.1039/c9sc05492h), 2020-02-03
Supplement: SC-011-C9SC05492H-s001.pdf [file SC-011-C9SC05492H-s001.pdf]

## Supplementary Information for

### **A simple and efficient approach toward deep-red to near-infrared-emitting iridium(III) complexes for organic light-emitting diodes with external quantum efficiencies of over 10%**

Zhao Chen\*, Hongyang Zhang, Dawei Wen, Wenhai Wu, Qingguang Zeng, Shuming Chen\* and Wai-Yeung Wong\*

Dr. Z. Chen, Dr. D. Wen, W. Wu, Prof. Q. Zeng  
School of Applied Physics and Materials, Wuyi University, Jiangmen, 529020, P. R. China

E-mail: chenzhao2006@163.com

Dr. H. Zhang and Prof. W.-Y. Wong

Department of Applied Biology and Chemical Technology, the Hong Kong Polytechnic University, Hung Hom, Hong Kong, P. R. China; The Hong Kong Polytechnic University Shenzhen Research Institute, Shenzhen, 518057, P. R. China

E-mail: wai-yeung.wong@polyu.edu.hk

Dr. S. Chen

Department of Electrical and Electronic Engineering, Southern University of Science and Technology, Shenzhen, 518055, P. R. China

E-mail: chen.sm@sustc.edu.cn

**Instrument:**  $^1\text{H}$ -NMR and  $^{13}\text{C}$ -NMR spectra were recorded in  $\text{CDCl}_3$  solvent at room temperature on a Bruker Avance 400 MHz spectrometer by using tetramethyl silane (TMS) signal as internal standards. Matrix-assisted laser desorption ionization time of flight mass spectrometry (MALDI-TOF-MS) was conducted on a Bruker Autoflex to obtain the mass spectra for **CNIr** and **TCNIr**. By using the operation mode of the positive ion mode, the Thermo Scientific Q Exactive HF Orbitrap-FTMS was used to record the electrospray ionization (ESI) mass spectrometry for the ligands (**L1** and **L2**). The UV-vis spectra were obtained on a HP-8453 diode array spectrophotometer at room temperature. During the absorption measurement, a quartz cuvette with the length of 1 cm was used as the holder. The concentration of phosphor was around  $10^{-4}$  M in tetrahydrofuran (THF) solution. The steady- and transient-state PL spectra at room temperature or 77 K were recorded from an Edinburgh Instruments Spectrometer FS5. The THF solutions consisting of phosphors ( $10^{-5}$  to  $10^{-4}$  M) and thin films fabricated by doping these phosphors into CBP were used to obtain the PL spectra, absolute PLQYs and lifetimes of excited states. Meanwhile, the absolute PLQYs were measured on a Hamamatsu Quantaurus-QY Plus C13534-12 by using the excitation at 450 nm for solutions and 300 nm for the doped films. The PLQY values were calculated by using equation (1):

$$PLQY = \frac{\text{Number of photons emitted from the sample}}{\text{Number of photons absorbed by the sample}} \quad (1).$$

During the time-resolved fluorescence measurements, a laser at 375 nm was used as an excitation source. The PL decay curves at room temperature and 77 K were fitted by using a single-exponential function  $I(t) = A\exp(-t/\tau)$ , where  $I(t)$  is the intensity of light at time  $t$ ,  $t$  is the time and  $\tau$  is the luminescence lifetime of the species. Electrochemical measurements were made by using a Princeton Applied Research model 273 A potentiostat as a scan rate of  $100 \text{ mV s}^{-1}$ . A conventional three-electrode configuration consisting of a glassy carbon (working electrode), platinum wire (counter electrode) and Ag/AgCl in saturated potassium chloride solution (reference electrode) was used. The supporting electrolyte was 0.1 M  $[\text{Bu}_4\text{N}]\text{PF}_6$  in dichloromethane. Ferrocene was used as a calibrant during each set of measurements,

and all potentials reported were quoted with reference to the ferrocene-ferrocenium (Fc/Fc<sup>+</sup>) couple (taken as  $E_{1/2} = +0.27$  V relative to the reference electrode). The oxidation ( $E_{ox}$ ) potentials were used to determine the HOMO energy levels by using the equation  $E_{HOMO} = -(E_{ox} + 4.8)$ , in which  $-4.8$  eV is the HOMO of the internal standard ferrocene with respect to the vacuum level.<sup>[1]</sup> Meanwhile, the LUMO energy levels of phosphors were estimated by using the equation  $E_{LUMO} = E_{HOMO} + E_g$ , where  $E_g$  is the band gaps of the phosphors and estimated from the absorption edge of UV-visible spectra. Thermal analyses were performed with Perkin-Elmer TGA thermal analyzer with a heating rate of 10 °C/min in the region from room temperature (25 °C) to 800 °C. For DFT calculations, the structures of these Ir(III) complexes were optimized by using density functional theory (DFT) with the PBE0 functional and 6-31G(d)/LanL2DZ basis set. The LanL2DZ basis set was used to treat the iridium atom and the 6-31G(d) basis set was used to treat all other atoms. All the calculations were performed using Gaussian 09 software package.<sup>[2]</sup>

**Device fabrication and measurement:** By using the architecture of ITO/HATCN (20 nm)/TAPC (40 nm)/mCP (5 nm)/ $x$  wt% CNIr or TCNIr doped in host materials (30 nm)/TPBi (40 nm)/LiF (1 nm)/Al (100), the devices were fabricated by depositing these functional materials layer-by-layer on pre-cleaned ITO glass substrates at a pressure of less than  $10^{-6}$  Torr. The concentrations of emitters were 5-20% and TcTa, TPBi, CBP and CDBP were used as the host materials. The sublimation rates for organics, LiF and Al were around 1, 0.3 and 10 Å/s. The active area of device was 2 mm × 2 mm. The EL spectra of devices were measured by fiber optic spectrometer (Ocean Optics USB 2000) in the normal direction. The  $J-V-L$  curves were investigated by a dual-channel Keithley 2614B source measure unit and a PIN-25D silicon photodiode. A PR-670 spectrometer (Photo Research) was used to record the EL spectra of **D7** at different applied voltages. All the measurements were conducted at room temperature under ambient condition.

**References:**

- [1] R. S. Ashraf, M. Shahid, E. Klemm, M. Al-Ibrahim, S. Sensfuss, *Macromol. Rapid Comm.*, 2006, **27**, 1454
- [2] Z. Chen, L. Wang, C.-L. Ho, S. Chen, S. Suramitr, A. Plucksacholatarn, N. Zhu, S. Hannongbua, W.-Y. Wong, *Adv. Optical Mater.*, 2018, **6**, 1800824.

Figures:

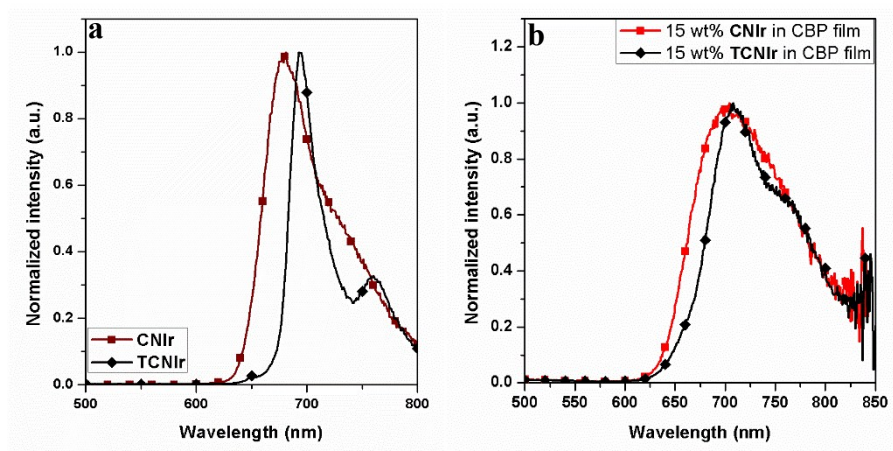

**Figure S1.** The photoluminescence spectra of **CNIr** and **TCNIr**: a) measured at 77 K in tetrahydrofuran solution, b) measured at room temperature in their doped films.

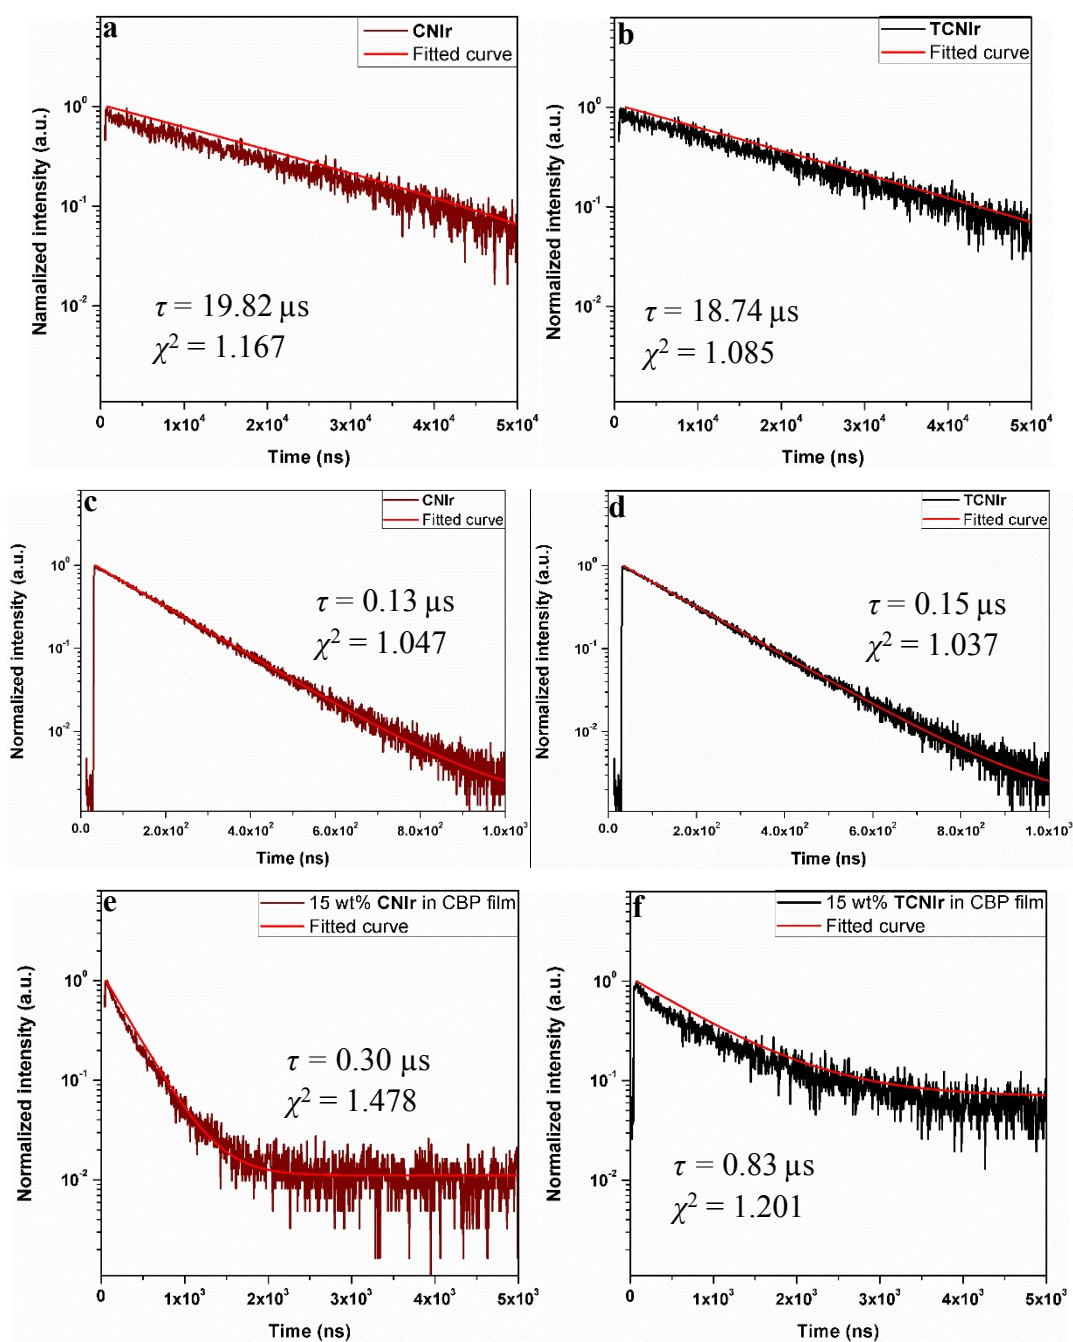

**Figure S2.** The photoluminescence decay curves of excited states for **CNIr** and **TCNir**: a) and b) measured at 77 K in tetrahydrofuran solution, c) and d) measured at room temperature in tetrahydrofuran solution, e) and f) measured at room temperature in their doped films.

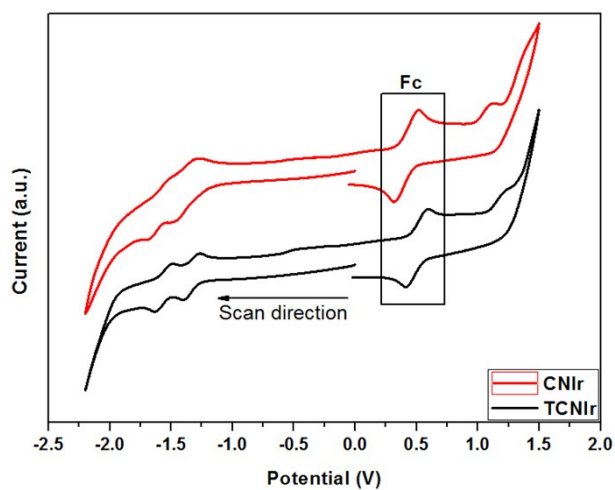

**Figure S3.** Cyclic voltammetry (CV) curves of the **CNIr** and **TCNIr** by referring to the standard ferrocene (Fc).

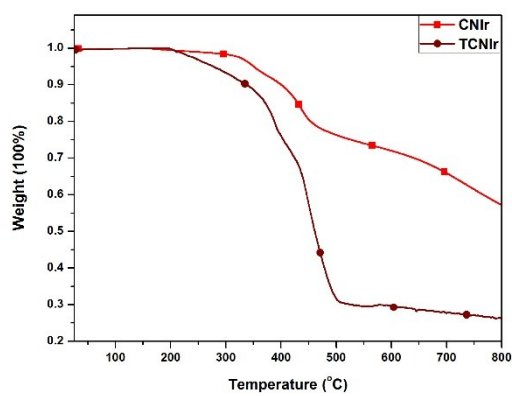

**Figure S4.** Thermogravimetric analysis (TGA) curves of the NIR-emitting **CNIr** and **TCNIr**.

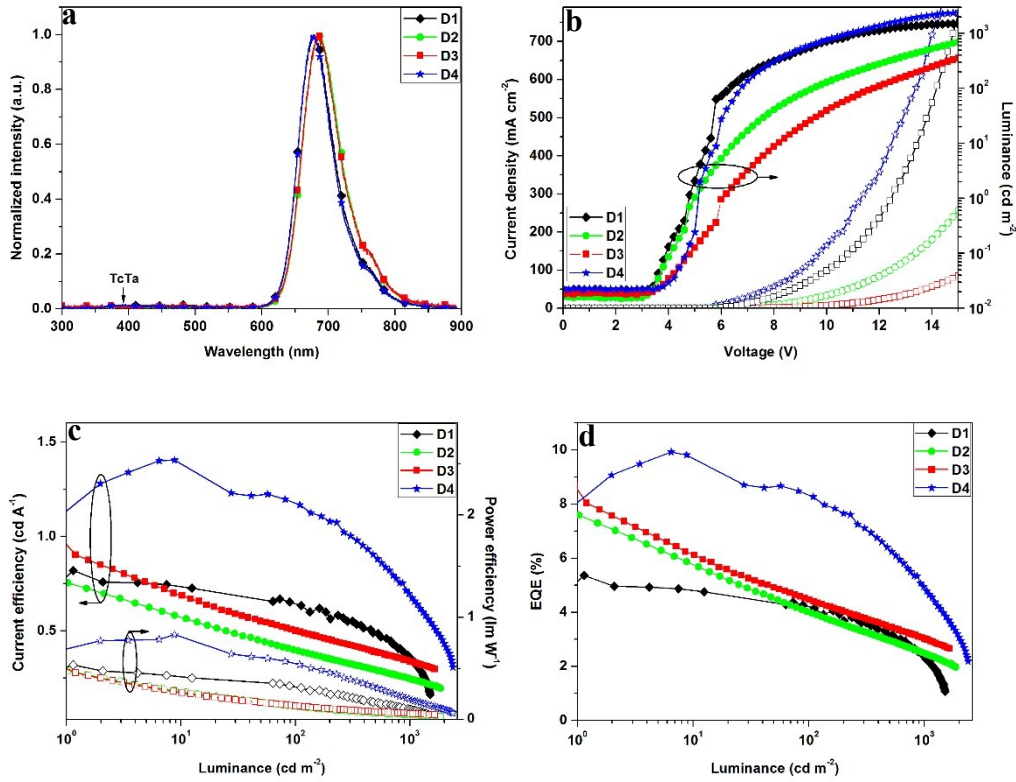

**Figure S5.** The performance of **D1–D4**: a) electroluminescence spectra; b) current density-voltage-luminance ( $J-V-L$ ) curves; c) current efficiency (CE) and power efficiency (PE) vs  $L$  curves and d) EQE vs  $L$  curves.

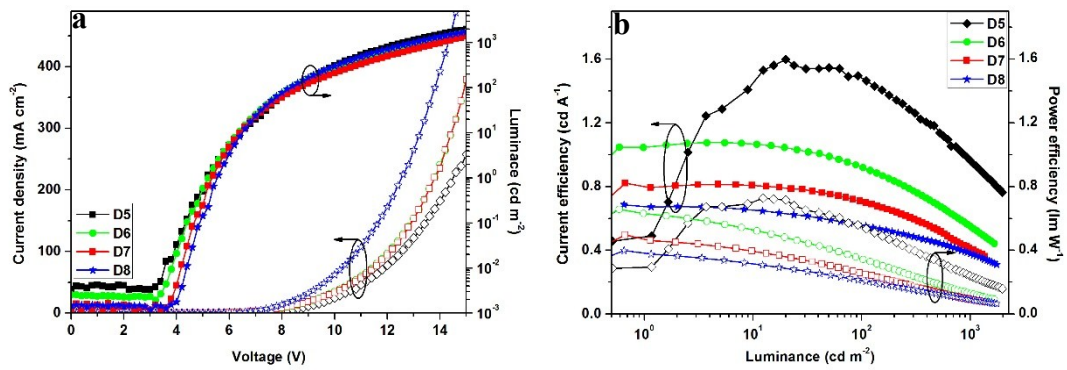

**Figure S6.** The  $J-V-L$  curves a) and CE/PE vs  $L$  curves b) of **D5–D8**.



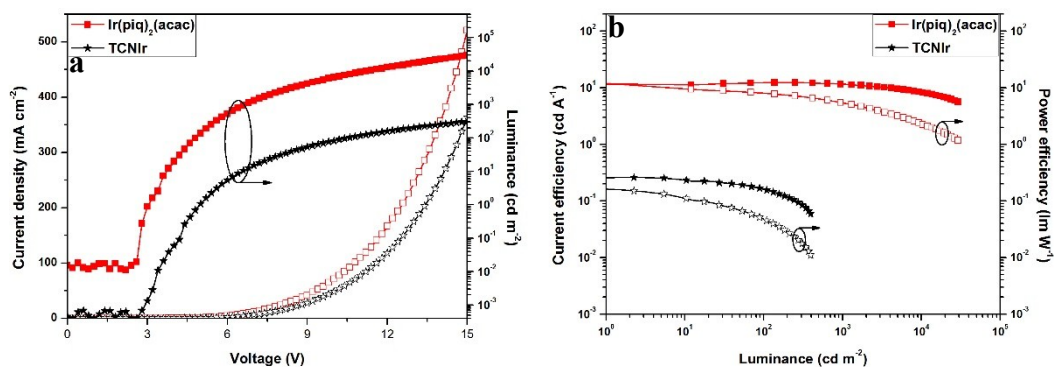

**Figure S7.** The  $J$ - $V$ - $L$  curves a) and CE/PE vs  $L$  curves b) of **D9** (made by TCNIr) and **D10** (made by  $\text{Ir}(\text{piq})_2(\text{acac})$ ).

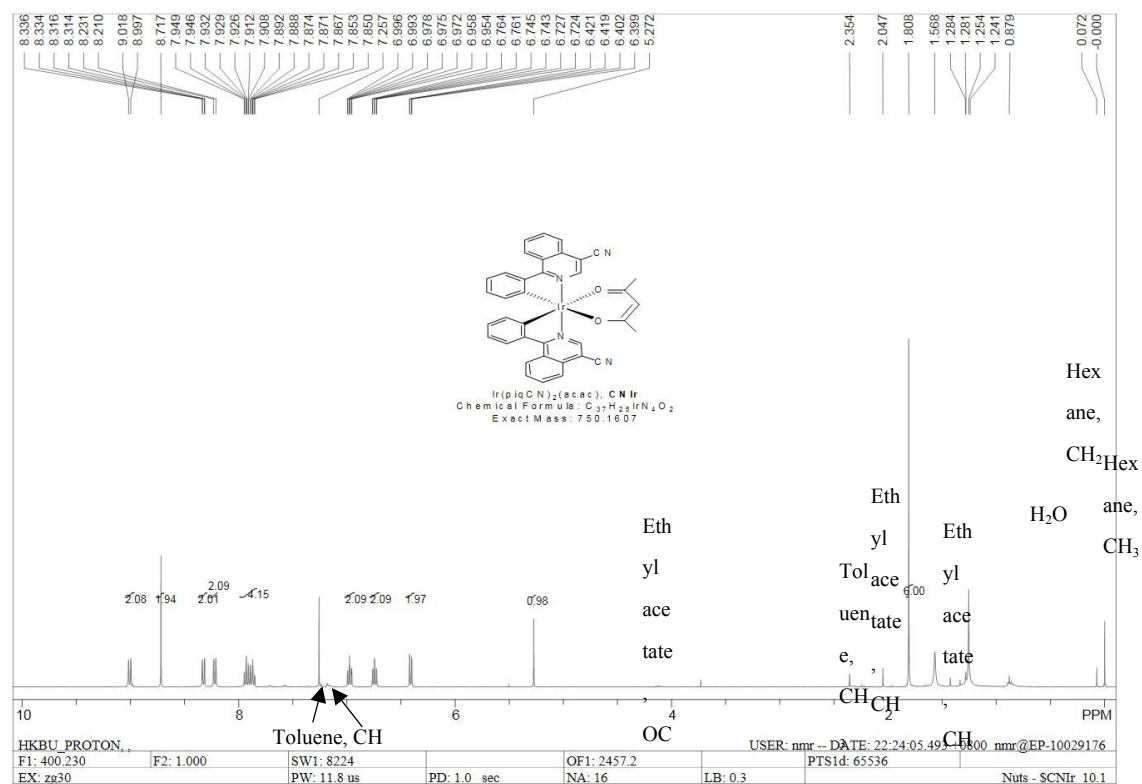

**Figure S8.** The  $^1\text{H}$  NMR spectrum of CNIr.

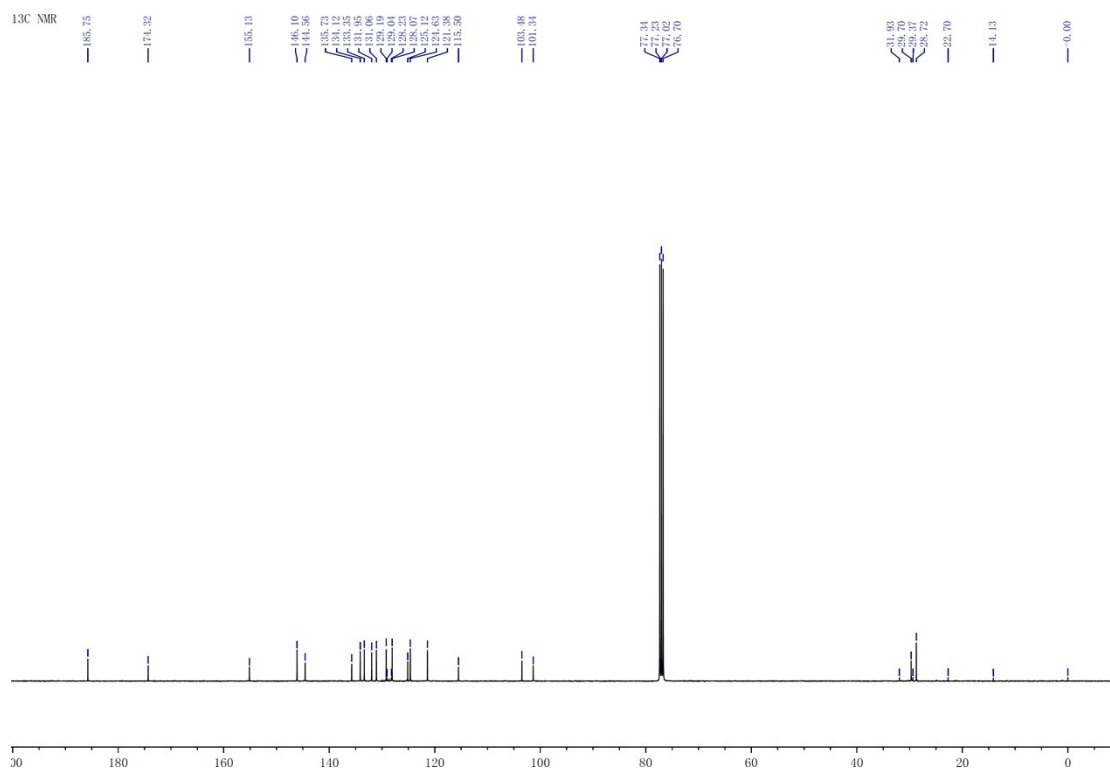

Figure S9. The <sup>13</sup>C NMR spectrum of CNIr.

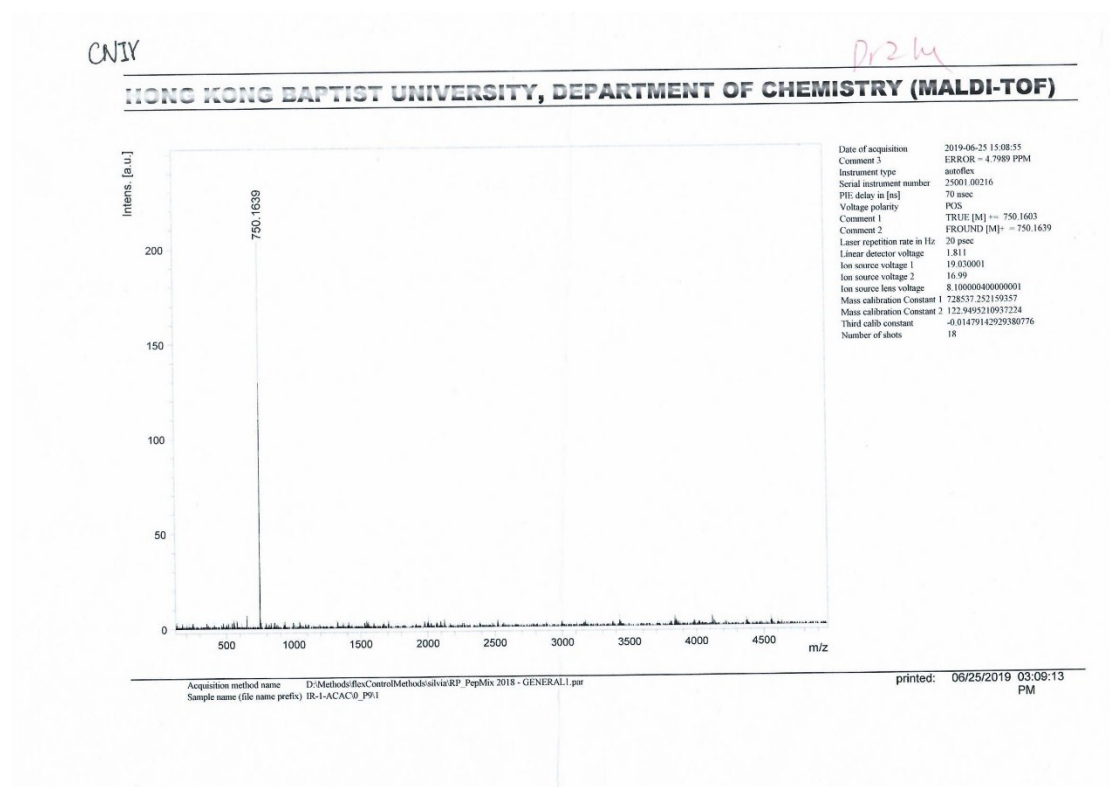

Figure S10. The mass spectrum of CNIr.

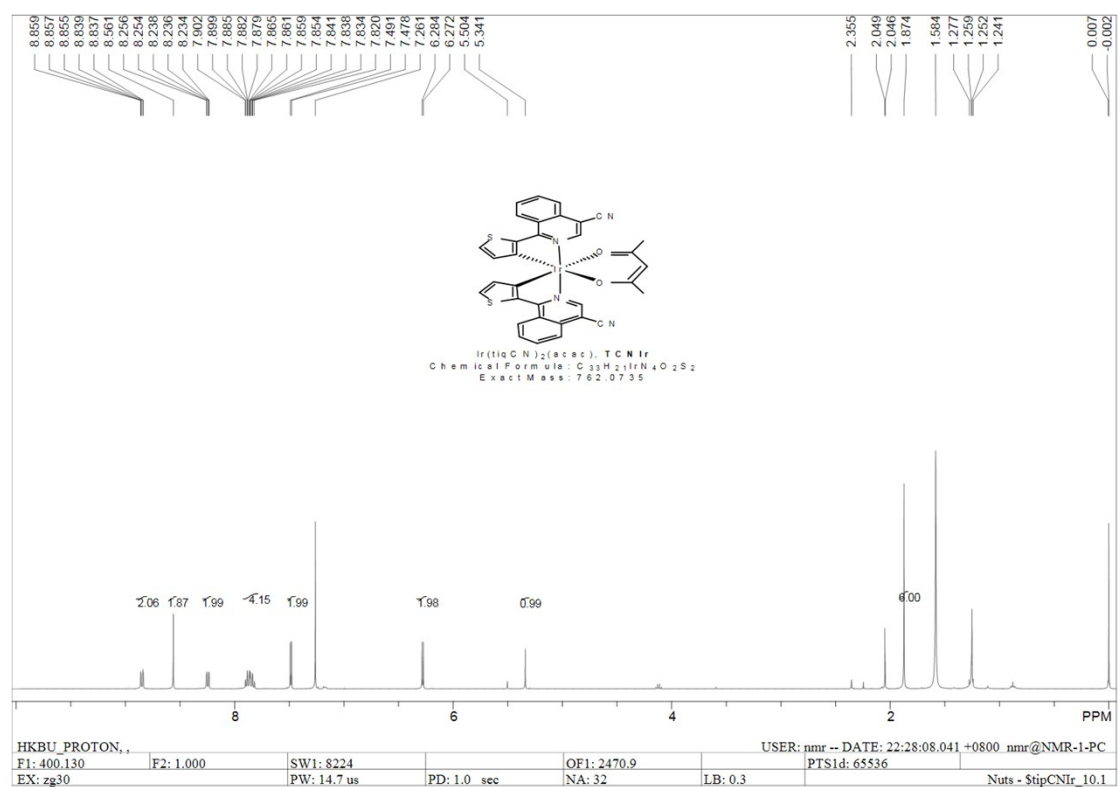

**Figure S11.** The  $^1\text{H}$  NMR spectrum of TCNIr.

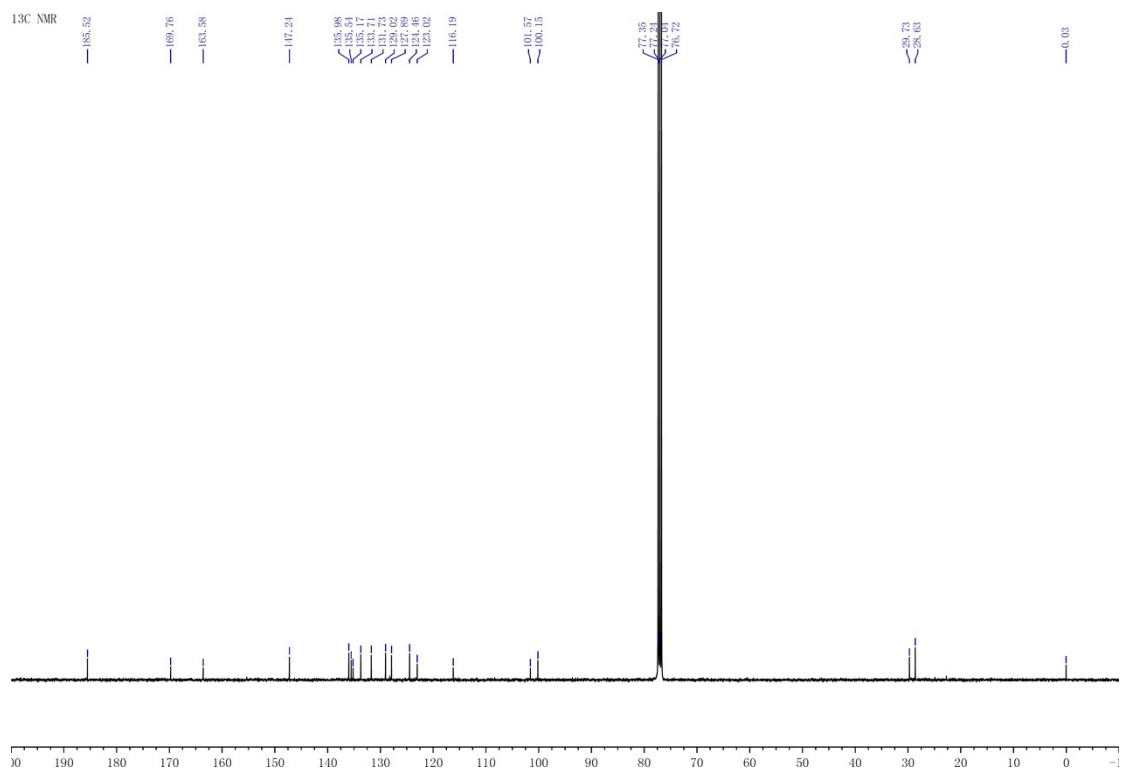

**Figure S12.** The  $^{13}\text{C}$  NMR spectrum of TCNIr.

TCNIr

Pr 24

HONG KONG BAPTIST UNIVERSITY, DEPARTMENT OF CHEMISTRY (MALDI-TOF)

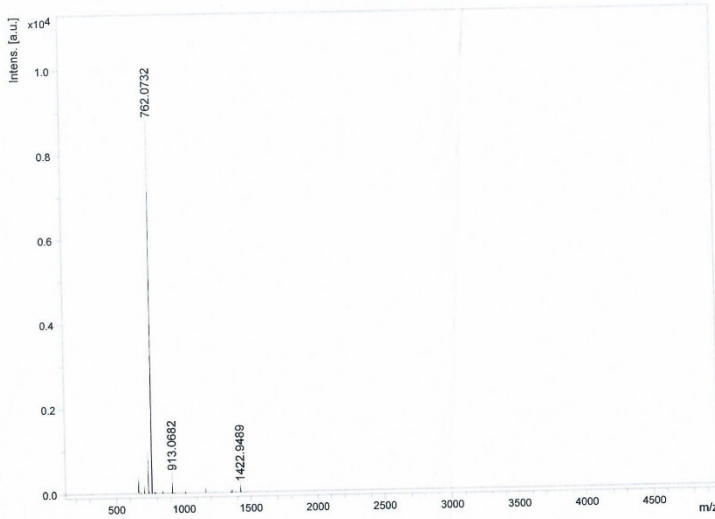

Date of acquisition 2019-06-25 15:11:06  
Comment 3 ERROR = 0.5249 PPM  
Instrument type autoflex  
Serial instrument number 25001.00216  
PIE delay in [ns] 110 msec  
Voltage polarity POS  
Comment 1 TRUE [M]<sup>+</sup> = 762.0728  
Comment 2 FROUND [M]<sup>+</sup> = 762.0732  
Laser repetition rate in Hz 20 msec  
Linear detector voltage 1.811  
Ion source voltage 1 19.030001  
Ion source voltage 2 16.99  
Ion source lens voltage 8.100000400000001  
Mass calibration Constant 1 728337.252199357  
Mass calibration Constant 2 122.9495210937224  
Third calib constant -0.01479142929380776  
Number of shots 41

Acquisition method name D:\Methods\flexControlMethods\salvia\RP\_PepMix 2018 - GENERAL1.par  
Sample name (file name prefix) IR-3-ACAC-0\_P10:1

printed: 06/25/2019 03:11:26 PM

Figure S13. The mass spectrum of TCNIr.
